# Supplementary material
Source: PubMed Central journal article supplement (PMC3448964)

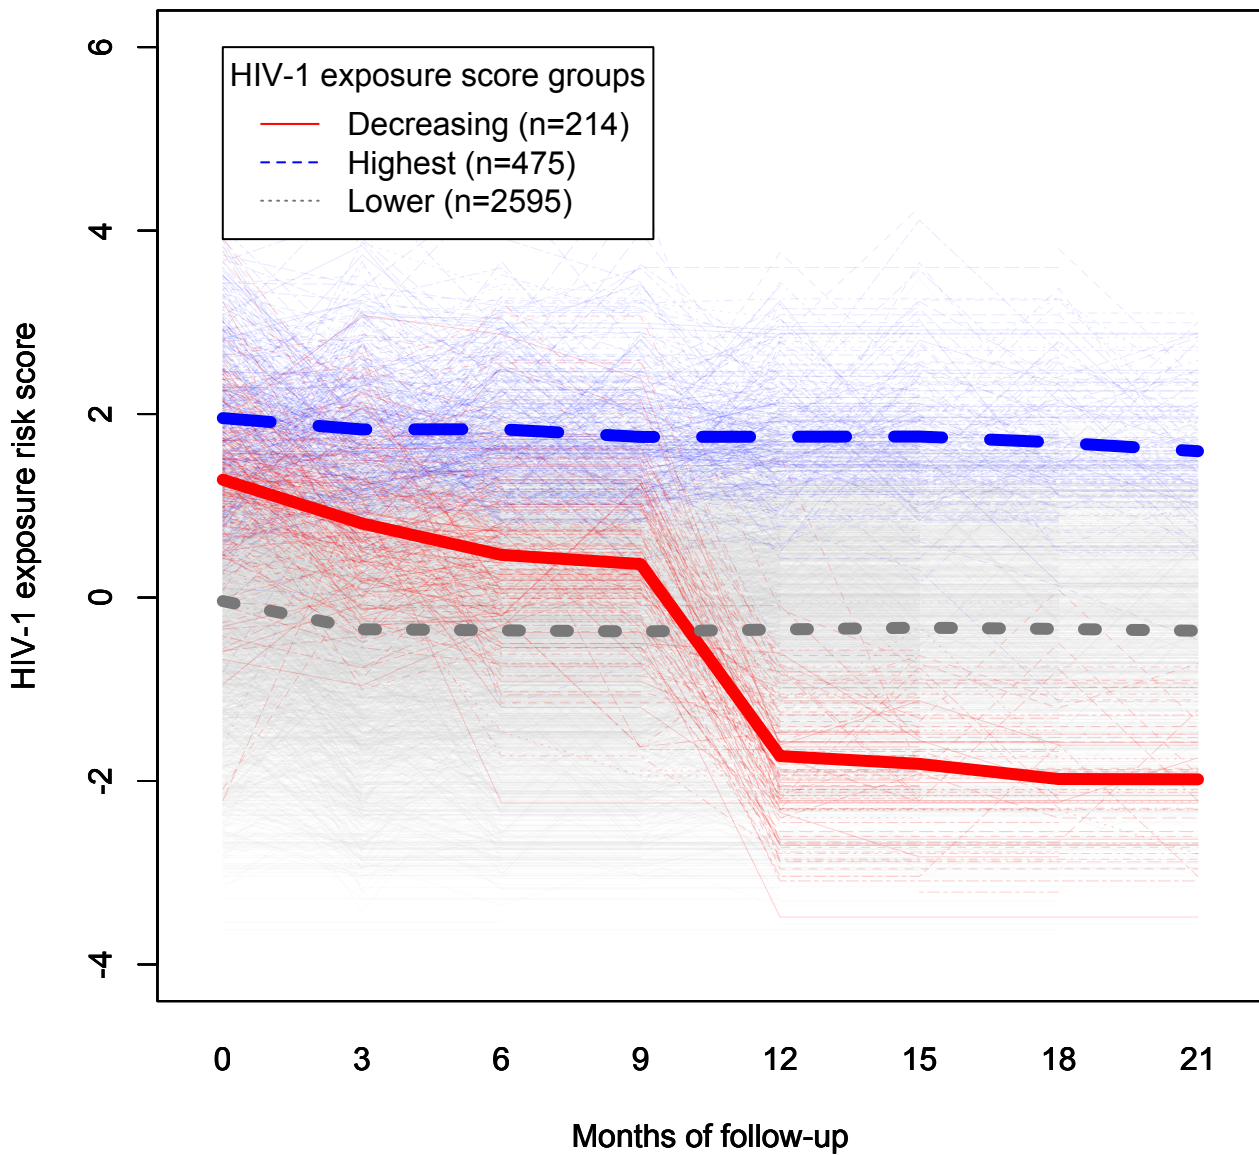

Supplement: supp_jis480_jis480supp_fig1.pdf [file supp_jis480_jis480supp_fig1.pdf]

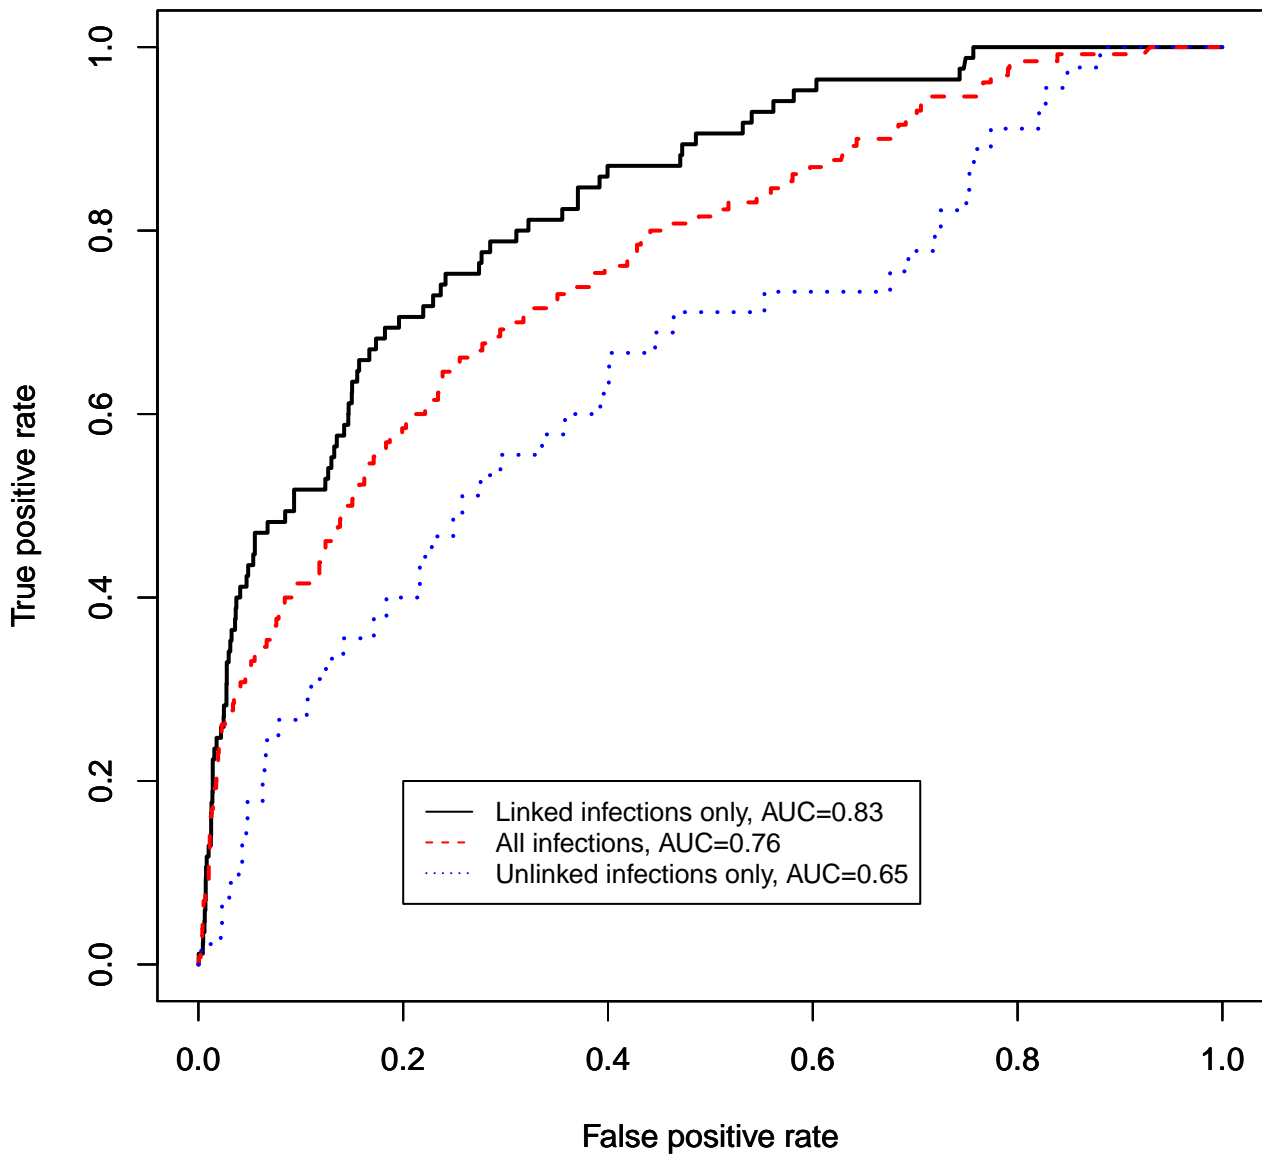

Supplement: supp_jis480_jis480supp_fig2.pdf [file supp_jis480_jis480supp_fig2.pdf]
